# Supplementary material
Source: PubMed Central journal article supplement (PMC2650130)
Supplement: 0808801106_0808801106SI.pdf [file 0808801106_0808801106SI.pdf]

# Supporting Information

O'Hagan *et al.* 10.1073/pnas.0808801106

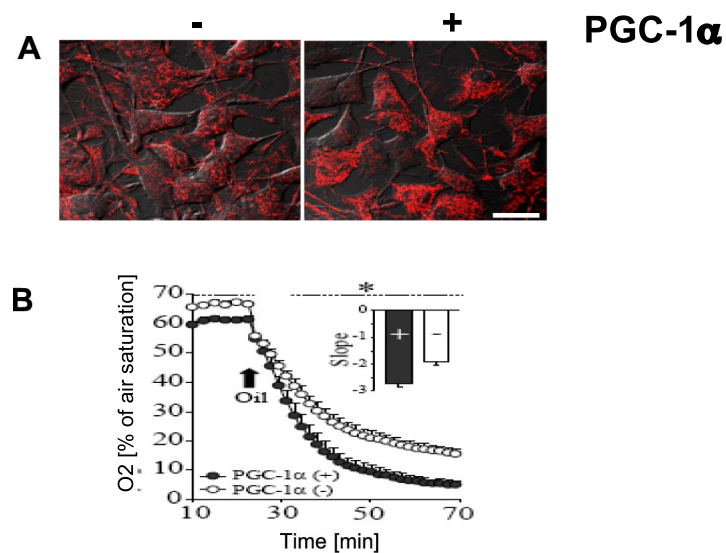

**Fig. S1.** PGC-1 $\alpha$  overexpression decreases intracellular oxygen levels in PC-12 cells. (A) PC-12 cells were transfected with either a pcDNA-PGC-1 $\alpha$ -expressing vector or an empty pcDNA control vector, and mitochondrial membrane potential was imaged with the potentiometric probe, TMRM. (Bar: 20  $\mu$ m.) (B) PC12 cells were cotransfected with near-infrared (NIR) oxygen probes, and either a pcDNA-PGC-1  $\alpha$  expression vector or an empty pcDNA vector and oxygen consumption was determined. \*,  $P < 0.05$ ; mean  $\pm$  SEM;  $n = 3$ .

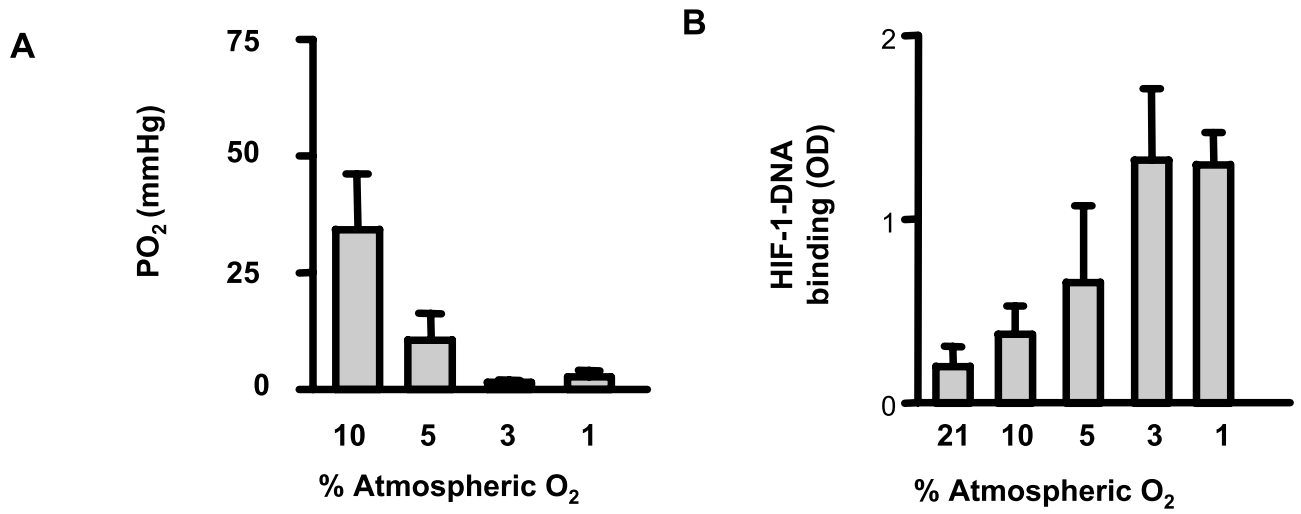

**Fig. S2.** Effects of decreasing atmospheric oxygen on extracellular PO<sub>2</sub> and HIF-1 $\alpha$  activation in HeLa cells. (A) Media PO<sub>2</sub> levels in HeLa cells were measured by using fluorescence quenching oxymetry in cells exposed to 10–1% atmospheric O<sub>2</sub> for 24 h. (B) HIF-1 $\alpha$  DNA binding assay (TransAM) was performed in HeLa cells exposed to 21–1% atmospheric O<sub>2</sub> for 24 h. Mean  $\pm$  SEM;  $n = 3$ .

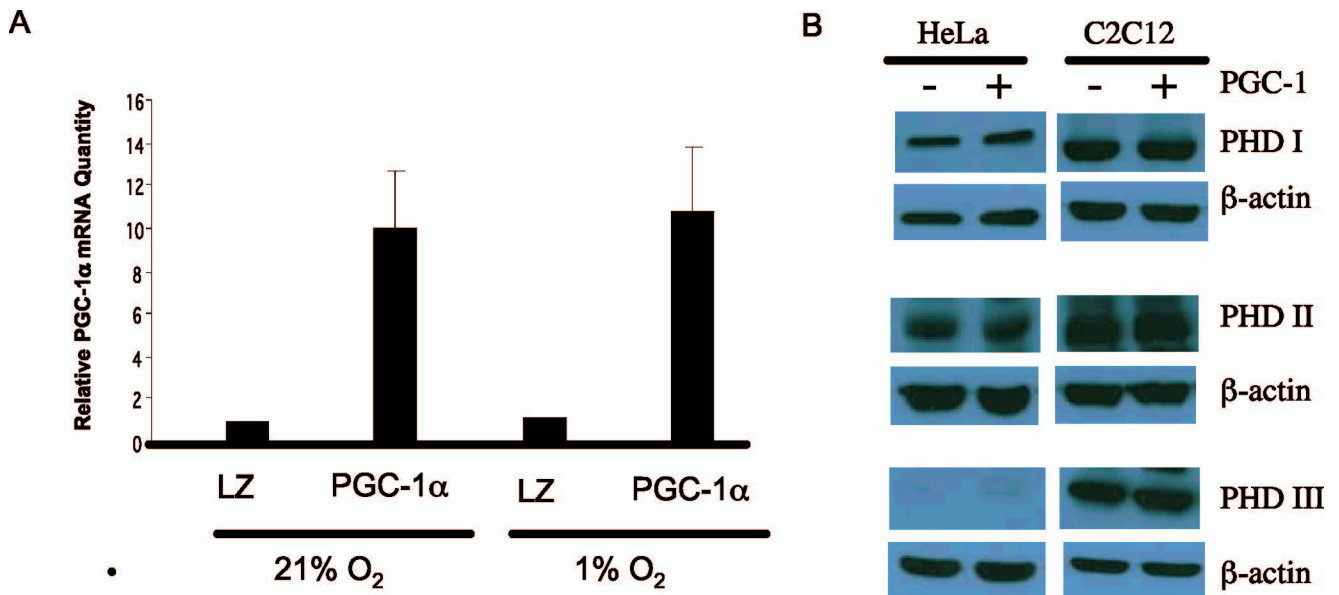

**Fig. 53.** Hypoxia does not effect PGC-1 $\alpha$  mRNA levels and PGC-1 $\alpha$  overexpression does not alter PHD levels in HeLa or C2C12 cells. **(A)** RT-PCR for PGC-1 $\alpha$  mRNA levels in L6 myotubes stably expressing PGC-1 $\alpha$  (PGC-1 $\alpha$ ) compared with control L6-LacZeo (LZ) cells after exposure to 21% or 1% O<sub>2</sub> for 24 h. Mean + SEM;  $n = 3$ . **(B)** Western blot analysis of PHDI, PHDII, and PHDIII in HeLa and C2C12 cells transfected with either PGC-1 $\alpha$  expression vector or control vector ( $n = 2$ ).

**Table S1. Selected genes involved in mitochondrial function in PGC-1 $\alpha$ -overexpressing cells through microarray analysis**

| Transcript Cluster ID | Gene name                                     | Gene symbol | Fold increase (Ad-PGC 1 $\alpha$ /Ad-GFP) | P value | Function                                                    |
|-----------------------|-----------------------------------------------|-------------|-------------------------------------------|---------|-------------------------------------------------------------|
| NM_001697             | ATP synthase, O subunit                       | ATP5O       | 1.58                                      | 0.016   | OX-PHOS                                                     |
| NM_001866             | Cytochrome c oxidase subunit VIIIb            | COX7B       | 2.28                                      | 0.002   | OX-PHOS                                                     |
| NM_001916             | Cytochrome c-1                                | CYC         | 2.0                                       | 0.029   | OX-PHOS                                                     |
| NM_018947             | Cytochrome c somatic                          | CYCS        | 3.43                                      | 0.009   | OX-PHOS                                                     |
| NM_014222             | NADH dehydrogenase 1 $\alpha$ subcomplex 8    | NDUFA8      | 3.79                                      | 0.005   | OX-PHOS                                                     |
| NM_004168             | Succinate dehydrogenase complex A             | SDHA        | 2.3                                       | 0.011   | OX-PHOS                                                     |
| NM_003000             | Succinate dehydrogenase complex B             | SDHB        | 2.63                                      | 0.011   | OX-PHOS                                                     |
| NM_006830             | Ubiquinol-cytochrome c reductase core protien | UQCRC       | 4.73                                      | 0.027   | OX-PHOS                                                     |
| NM_001876             | Carnitine palmitoyltranferase                 | CPT1        | 2.69                                      | 0.005   | Fatty acid oxidation                                        |
| NM_181425             | Frataxin                                      | FXN         | 2.42                                      | 0.007   | Mitochondrial import protein                                |
| NM_000636             | Superoxide dismutase 2                        | SOD         | 2.06                                      | 0.005   | Superoxide dismutase activity                               |
| NM_004451             | Estrogen-related receptor $\alpha$            | ESRRA       | 3.29                                      | 0.037   | Transcription factor of nuclear encoded mitochondrial genes |
| NM_003201             | Mitochondrial transcription factor A          | TFAM        | 2.19                                      | 0.015   | Mitochondrial transcription factor                          |

Shown are microarray data for primary human skeletal muscle cells infected with an adenovirus encoding GFP (Ad-GFP) versus cells infected with an adenovirus encoding PGC-1 $\alpha$  (Ad-PGC-1 $\alpha$ ). Only genes with  $P \leq 0.05$  are included.

**Table S2. Identification of HIF target genes in PGC-1 $\alpha$ -expressing cells by microarray analysis**

| Transcript cluster ID | Gene name                          | Gene symbol | Fold increase (Ad-PGC 1 $\alpha$ /Ad-GFP) | P Value | Function                    |
|-----------------------|------------------------------------|-------------|-------------------------------------------|---------|-----------------------------|
| NM_033500             | Hexokinase 1                       | HK1         | 2.28                                      | 0.01    | Glycolysis                  |
| NM_005165             | Aldolase C                         | ALDOC       | 1.96                                      | 0.002   | Glycolysis                  |
| NM_000289             | Phosphofructokinase (muscle)       | PFKM        | 2.59                                      | 0.003   | Glycolysis                  |
| NM_001025366          | Vascular endothelial growth factor | VEGF        | 1.44                                      | 0.014   | Angiogenic signaling        |
| NM_003234             | Transferrin receptor               | TfRC        | 1.44                                      | 0.05    | Iron transport              |
| NM_003226             | Intestinal trefoil Factor 3        | TFF3        | 1.88                                      | 0.05    | Matrix and barrier function |
| NM_000609             | Stromal cell-derived factor 1      | CXCL12      | 1.27                                      | 0.05    | Angiogenic signaling        |
| NM_199168             |                                    |             |                                           |         |                             |
| NM_001033886          |                                    |             |                                           |         |                             |
| NM_016282             | Adenylate kinase 3                 | AK3         | 1.78                                      | 0.009   | Energy homeostasis          |
| NM_004827             | ATP-binding cassette, subfamily G  | ABCG2       | 5.14                                      | 0.06    | Heme regulation             |

Shown are microarray data for primary human skeletal muscle cells infected with an adenovirus encoding GFP (Ad-GFP) versus cells infected with an adenovirus encoding PGC-1 $\alpha$  (Ad-PGC-1 $\alpha$ ).

**Table S3. Primers used for real-time PCR analysis**

| Gene name                   | Forward                    | Reverse                    |
|-----------------------------|----------------------------|----------------------------|
| Aldolase C                  | 5'-GGAGTCACGTAGCTCTGC-3'   | 5'-GACAACTCCTTCTTGCTC-3'   |
| PFKB                        | 5'-CAACAGCTATGAAACCAACC-3' | 5'-CACCCAAGATTAACACTT-3'   |
| PFKM                        | 5'-TCTTTGCCATGAGGGTTAT-3'  | 5'-CAATGACACAGAGATTGGTG-3' |
| VEGFA                       | 5'-AACCATGAACTTTCTGCTGT-3' | 5'-GGCTTGAAGATGTACTCGAT-3' |
| TfR (Human, murine, rattus) | 5'-CTCGTGAGGCTGGATCTC-3'   | 5'-TAGCATGGACCAGTTTACC-3'  |
